# Supplementary material for: Validation of an MRI-only planning workflow for definitive pelvic radiotherapy
Source: Springer Nature journal article supplement (doi:10.1186/s13014-022-02023-4), 2022-03-18
Supplement: MOESM1 [file 20233080]

**ADDITIONAL FILE 1:**

DVH data collection table: Organ at risk and target volume DVH parameters assessed by treatment site

| <b>Primary Disease Site</b> | <b>Prescribed Dose</b> | <b>Organ at Risk</b> | <b>Dose parameters assessed</b> |
|-----------------------------|------------------------|----------------------|---------------------------------|
| <b>Rectum (n=24)</b>        | 60Gy/30fx (n=1)        | GTV                  | D95%                            |
|                             | 50.4Gy/28fx (n=1)      | CTV high             | D95%                            |
|                             | 50Gy/25fx (n=22)       | CTV low              | D95%                            |
|                             |                        | PTV high             | D2%                             |
|                             |                        |                      | D95%                            |
|                             |                        | PTV low              | D2%                             |
|                             |                        |                      | D95%                            |
|                             |                        | Small Bowel          | D2%                             |
|                             |                        |                      | D20%                            |
|                             |                        | Bladder              | D20%                            |
|                             |                        |                      | D40%                            |
|                             |                        | Right Neck of Femur  | D40%                            |
|                             | D25%                   |                      |                                 |
| Left Neck of Femur          | D40%                   |                      |                                 |
|                             | D25%                   |                      |                                 |
| <b>Anal Canal (n=4)</b>     | 54Gy/30fx (n=2)        | GTV                  | D95%                            |
|                             | 50.4Gy/28fx (n=1)      | CTV high             | D95%                            |
|                             | 50Gy/25fx (n=1)        | CTV low              | D95%                            |
|                             |                        | PTV boost (n=1)      | D2%                             |
|                             |                        |                      | D95%                            |
|                             |                        | PTV high             | D2%                             |
|                             |                        |                      | D95%                            |
|                             |                        | PTV low              | D2%                             |
|                             | D95%                   |                      |                                 |

|                     |                 |                     |             |
|---------------------|-----------------|---------------------|-------------|
|                     |                 | Small Bowel         | D2%         |
|                     |                 |                     | D20%        |
|                     |                 | Bladder             | D20%        |
|                     |                 |                     | D50%        |
|                     |                 | Right Neck of Femur | D50%        |
|                     |                 | Left Neck of Femur  | D50%        |
|                     |                 | Genitalia           | V50%        |
| <b>Cervix (n=8)</b> | 55Gy/25fx (n=1) | CTV high            | D95%        |
|                     | 50Gy/25fx (n=4) | CTV low             | D95%        |
|                     | 45Gy/25fx (n=3) | PTV boost (n=1)     | D95%        |
|                     |                 | PTV high            | D2%         |
|                     |                 |                     | D10%        |
|                     |                 |                     | D95%        |
|                     |                 | PTV low             | D2%         |
|                     |                 |                     | D95%        |
|                     |                 | Small Bowel         | D2%         |
|                     |                 |                     | D20% (n= 3) |
|                     |                 |                     | D25% (n= 5) |
|                     |                 | Bladder             | D20%        |
|                     |                 |                     | D35%        |
|                     |                 | Right Neck of Femur | D25%        |
|                     |                 | Left Neck of Femur  | D25%        |
|                     |                 | Rectum              | D20%        |
|                     |                 |                     | D60%        |
| <b>Endometrium</b>  | 54Gy/30fx (n=1) | CTV high            | D95%        |
| <b>(n=4)</b>        | 50Gy/25fx (n=1) | CTV low             | D95%        |

|                    |                     |      |
|--------------------|---------------------|------|
| 45Gy/25fx (n=2)    | PTV high            | D2%  |
|                    |                     | D10% |
|                    |                     | D95% |
|                    | PTV low             | D2%  |
|                    |                     | D95% |
|                    | Small Bowel         | D2%  |
|                    |                     | D25% |
|                    | Bladder             | D20% |
|                    |                     | D35% |
|                    | Right Neck of Femur | D25% |
| Left Neck of Femur | D25%                |      |
| Rectum             | D20%                |      |
|                    | D60%                |      |

PTV High = Planning target volume higher prescribed dose, PTV High Boost = Planning target volume dose escalation region, PTV Low = Planning target volume lower prescribed dose, GTV= Gross tumour volume, CTV High = Clinical target
