# Supplementary material for: Validation of an MRI-only planning workflow for definitive pelvic radiotherapy
Source: Springer Nature journal article supplement (doi:10.1186/s13014-022-02023-4), 2022-03-18
Supplement: MOESM2 [file 20233080]

## ADDITIONAL FILE 2:

Detailed DVH results table: Organ at risk and target volume DVH percentage dose difference separated by individual parameters for male and female cohorts. Note: Some structure parameters are not included as sample size is too small for individual analysis.

| <b>OAR DVH parameter</b> | <b>Cohort</b> | <b>Median (% dose difference)</b> | <b>Inter-quartile range</b> | <b>Wilcoxon signed-rank test p-value</b> |
|--------------------------|---------------|-----------------------------------|-----------------------------|------------------------------------------|
| <b>PTV High D10%</b>     | Female        | -0.6                              | -0.4 to -1.0                | <0.05                                    |
| <b>PTV High D2%</b>      | Female        | -0.6                              | -0.4 to -1.0                | <0.05                                    |
|                          | Male          | -0.5                              | -2.1 to -6.3                | <0.05                                    |
| <b>PTV High D95%</b>     | Female        | -0.6                              | -0.1 to -0.8                | 0.07                                     |
|                          | Male          | -0.3                              | -0.1 to -0.6                | <0.05                                    |
| <b>PTV Low D2%</b>       | Female        | -0.6                              | -0.3 to -1.1                | <0.05                                    |
|                          | Male          | -0.4                              | -0.2 to -0.6                | <0.05                                    |
| <b>PTV Low D95%</b>      | Female        | -0.4                              | 0.1 to -0.9                 | 0.61                                     |
|                          | Male          | -0.3                              | 0.1 to -0.6                 | <0.05                                    |
| <b>GTV D95%</b>          | Female        | -0.8                              | 0.1 to -1.0                 | <0.05                                    |
|                          | Male          | -0.4                              | -0.2 to -0.6                | <0.05                                    |
| <b>CTV High D95%</b>     | Female        | -0.8                              | -0.4 to -1.0                | <0.05                                    |
|                          | Male          | -0.4                              | -0.2 to -0.8                | <0.05                                    |
| <b>CTV Low D95%</b>      | Female        | -0.4                              | -0.2 to -0.9                | <0.05                                    |
|                          | Male          | -0.3                              | -0.1 to -0.6                | <0.05                                    |
| <b>Small Bowel D2%</b>   | Female        | -0.3                              | 0.2 to -0.9                 | 0.06                                     |
|                          | Male          | -0.4                              | 0.1 to -0.8                 | 0.09                                     |
| <b>Small Bowel D20%</b>  | Female        | 0.0                               | 0.3 to -1.2                 | 0.72                                     |
|                          | Male          | -0.5                              | 0.0 to -1.1                 | <0.05                                    |
| <b>Small Bowel D25%</b>  | Female        | -0.6                              | 0.2 to -1.4                 | <0.05                                    |
| <b>Bladder D20%</b>      | Female        | -0.6                              | 0.2 to -0.9                 | 0.06                                     |
|                          | Male          | -0.1                              | 0.2 to -0.9                 | 0.19                                     |
| <b>Bladder D40%</b>      | Male          | -0.1                              | 0.2 to -0.3                 | 0.24                                     |
| <b>Bladder D35%</b>      | Female        | -0.8                              | -0.5 to -1.2                | <0.05                                    |
| <b>RT NOF D25%</b>       | Female        | -0.8                              | 0.5 to -1.0                 | <0.05                                    |
|                          | Male          | 0.0                               | 0.7 to -0.4                 | 0.67                                     |
| <b>LT NOF D25%</b>       | Female        | -0.1                              | 0.4 to -0.6                 | 0.90                                     |
|                          | Male          | 0.0                               | 1.1 to -0.5                 | 0.58                                     |
| <b>Rectum D20%</b>       | Female        | -0.4                              | 0.6 to -1.1                 | 0.13                                     |
| <b>Rectum D60%</b>       | Female        | 0.1                               | 0.6 to -0.5                 | 0.87                                     |

PTV High = Planning target volume higher prescribed dose, PTV Low = Planning target volume lower prescribed dose, GTV= Gross tumour volume, CTV High = Clinical target volume higher prescribed dose, CTV Low = Clinical target volume lower prescribed dose, RT NOF = Right neck of femur, LT NOF = Left neck of femur
